# Supplementary material for: Human fetal globin gene expression is regulated by LYAR
Source: PubMed Central journal article supplement (PMC4150809; doi:10.1093/nar/gku718), 2014-08-04

## SUPPLEMENTARY MATERIALS

### Supplementary figure legends

**Figure S1.** Specificity of anti-LYAR antibody. (A) Western blot analysis of cell lysates from K562 cells with pre-immune serum and anti-LYAR antibody. (B) Western blot analysis using indicated antibodies of cell lysates from K562 cells stably overexpressing 3HA-LYAR or vector control.

**Figure S2.** ChIP and Q-RT-PCR primer sequences.

**Figure S3.** Human LYAR (GI: 49065522) and mouse LYAR (GI: 188219567) protein sequence alignment with Clustal 2.1. A stretch of mostly charged amino acids is boxed. Potential zinc-binding residues in a cluster (C6HC) are indicated by arrows.

**Figure S4.** Chromatin fractions from K562 cells were immunoprecipitated with anti-LYAR antibody and amplified with primer pairs spanning the indicated regions of the  $\gamma$ -promoter (P-2 to P-1) and  $\gamma$ -gene (P+1 to P+4). Normal rabbit IgG served as the control. #P>0.05, \*P<0.05, \*\*P<0.01 compared to the IgG control.

**Figure S5.** Total DNA sequence alignment of DNA sequencing results from CASTing. Consensus sequences are boxed.

**Figure S6.** Cell growth curve of Scrambled control K562 cells (Scr), LYAR

knockdown cells (LYAR-KD1, LYAR-KD2).

**Figure S7.** LYAR regulates mouse embryonic globin gene expression in MEL cells.

(A) Western blot analysis with indicated antibodies of lysates from LYAR-knockdown 1 (KD1) and LYAR-knockdown 2 (KD2) or scrambled (Scr) control MEL cells. (B) LYAR,  $\epsilon\gamma$ -globin,  $\beta$ h1-globin,  $\beta$ maj- and  $\beta$ min-globin gene expression analyses by Q-RT-PCR of RNA extracted from LYAR-KD1, LYAR-KD2, and scrambled control (Scr) MEL cells normalized to  $\beta$ -actin mRNA. Results are shown as mean  $\pm$  SD from three independent experiments. **\*\*** $P < 0.01$  compared to the scrambled control.

**Figure S8.** Wright-Giemsa-stained adult erythroid progenitor cells at indicated different days of differentiation.

**Figure S9.** Q-RT-PCR analysis of CD71 and v-myb in Scrambled or LYAR knockdown (KD) K562 cells (A) and human adult erythroid (AE) progenitor cells (B). Results are shown as mean  $\pm$  SD from three independent experiments. **#** $P > 0.05$ , **\*** $P < 0.05$  compared to the Scramble control.

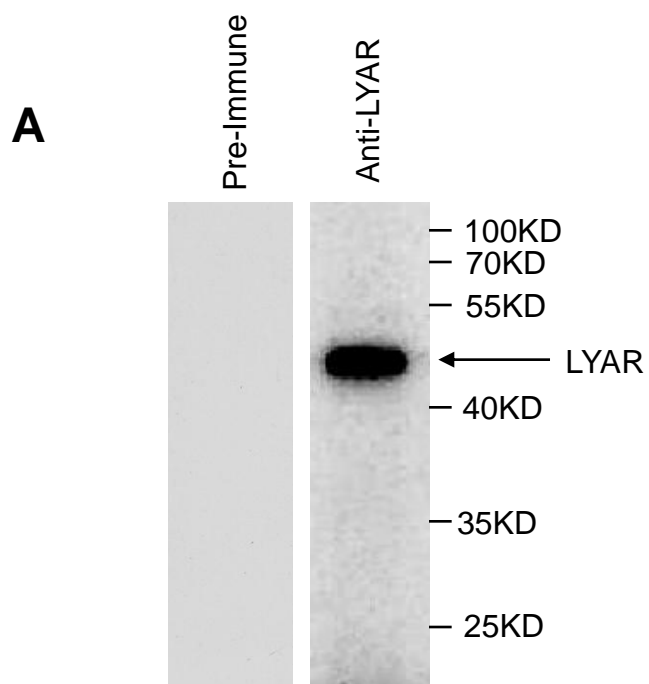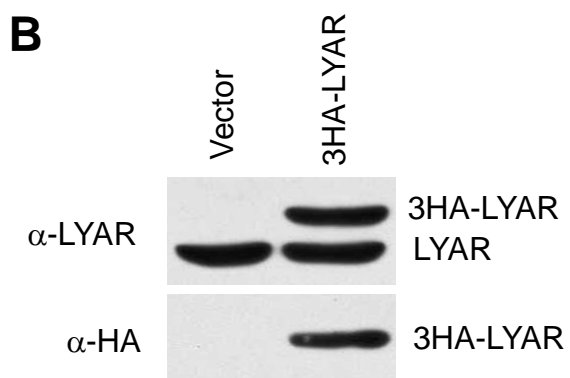

ChIP primer sequences

| <b>Locus</b> | <b>5' Primer</b>         | <b>3' Primer</b>           |
|--------------|--------------------------|----------------------------|
| HS4          | AAGGGGTGGACTCCAGAGAC     | CTCCTGACTTTCTGTCTAGT       |
| HS3          | TATGTATGGGTCAGTGGTCT     | CCCTGCTTAGGAGCTTAATC       |
| HS2          | AAGCATGAGCAGTTCTGGCCAG   | TATGATGCCGTTTGAGGTGGAG     |
| HS1          | CATGCAGGACTCTCAAACACTAAC | TCAACAGAGATGGGCAAACCC      |
| ε-pro        | TTTTAAGTACCATGGAGAACAGG  | ATGAAATGACACCATATCAGATAC   |
| γ-pro        | ATCCAGTGAGGCCAGGGGC      | GAGATTGACAAGAACAGTTTGAC    |
| G/Αγ         | ATCAGCGTGTTCATGTCTCAG    | CATGAGCTCCTCTAAACCTG       |
| β-pro        | TGCTTACCAAGCTGTGATTCC    | AACGGCAGACTTCTCCTCAGG      |
| 3'-HS        | TCACTGAAGTAGGGAGGGAAGAA  | AAGGTCATTCCTTTAATGGTCTTTTC |
| P-1          | GAATCGGAACAAGGCAAAGG     | GTGGAAGTCTGTAAGGGTG        |
| P-2          | CAAAAATCCTGGACCTATGC     | CCTTTGCCTTGTTCCGATTC       |
| P+1          | CACCCTTCAGCAGTTCCAC      | CACAAATCCTGAGAAGCGAC       |
| P+2          | GTCGCTTCTCAGGATTTGTG     | TCACAGTGCAGTTCACTCAG       |
| P+3          | TGAGTGAAGTCACTGTGAC      | TTTTTCAGAGGCACTCCTTAG      |
| P+4          | CTAAGGAGTGCTCTGAAA       | TTCTCACCCCTGGACATAC        |

Q-RT-PCR primer sequences

| <b>Gene</b>         | <b>5' Primer</b>         | <b>3' Primer</b>         |
|---------------------|--------------------------|--------------------------|
| <u><b>Human</b></u> |                          |                          |
| LYAR                | TCCAACAGCGAACCAGTC       | ACGGCGTCTTTCACTTTG       |
| α-globin            | TGGGGTAAGGTCGGCGCGCA     | TGCACCGCAGGGGTGAACTC     |
| β-globin            | TCTGTCCACTCCTGATGCTGTTA  | ATTAGCCACACCAGCCACCACT   |
| γ-globin            | AATGTGGAAGATGCTGGAGGAGAA | CTTCTTGCCATGTGCCTTGACTT  |
| v-myb               | GAAAGCGTCACTTGGGGAAAA    | TGTTTCGATTCGGGAGATAATTGG |
| CD71                | GGCTACTTGGGCTATTGTAAAGG  | CAGTTTCTCCGACAACCTTCTCT  |
| <u><b>Mouse</b></u> |                          |                          |
| LYAR                | ATGTGGTGAATCCGTGAAGAAAA  | TTGCCTCCGTACTTCTGACCT    |
| εγ-globin           | TGGCCTGTGGAGTAAGGTCAA    | GAAGCAGAGGACAAGTTCCCA    |
| βh1-globin          | GAAACCCCCGGATTAGAGCC     | GAGCAAAGGTCTCCTTGAGGT    |
| βminor-globin       | TCTGCTGTCTCTTGCCTGTG     | CCTTTTTGCCATGGGCCTTC     |
| βmajor-globin       | GGTAATGCCAAAGTGAAGGC     | GGCCAGCACAATCACGATCAT    |

```

      ↓ ↓                ↓ ↓ ↓ ↓                ↓ ↓
human  MVFFTCNACGESVKKIQVEKRVSVCRNCECLSCIDCGKDFWGDDYKNHVKCI SEDQKYGG 60
mouse  MVFFTCNACGESVKKIQVEKHVSNCRNCECLSCIDCGKDFWGDDYKSHVKCISEGQKYGG 60
      *****:*** *****.*****.*****.*****

human  KGYEGKTHKGDIKQQAWIQKISELIKRPNVSPKVRELLEQISAFDNVPRKKAQFQNWMMKN 120
mouse  KGYEAKTHKGDIAKQQAWIQKINELIKKPNVSPKVRELLQQISAFDNVPRKKAQFQNWMMKN 120
      ****.***** *****.*****.*****.*****.*****.*****

human  SLKVHNESILDQVWNIFSEASNSEFVNKEQDQRPLHPVANPHAEIS-TKVPASKVKDAVE 179
mouse  SLKVHSDSVLEQVWDIFSEASSSE---QDQQQPPSH-TAKPHAEMPITKVPSAKINGTIE 176
      *****:***:***:*****:** :*** * * .*:*****: *****:*.:.:.

human  QQGEVKKNKREKKEERQKKRKEKKELEKLENHQENSRNQPKPKRKKGGQEADLEAGGEEVP 239
mouse  EQTEAKKNKREKKEERQKNRKEKKELEKLENHQENLRGQPKPKRKKNQEAGHEAAGEEAA 236
      :* *.*****:***:***** * .*****.***. **.***.

human  EANG-----SAGKRSKSKKQQRK----DSASEEEARVAGKRKR-RHSEVETDSKSKKM 287
mouse  EASGPPEKKAQGGQASEEGADRNGGPGEDAAEGQTKTAAGKRKRPKHSGAESGYKSKKM 296
      **.* ..*: **: *: :*: :*:..***** **: *. *

human  KLPEHPPEGPEDEAPAKGKFNWKGTIKAILKQAPDNEITIKLKRKKVLAQYYTVIDEH 347
mouse  KLPEQPEEGEAKDHEAPSKGKFNWKGTIKAVLKQAPDNEISVKKLKKKVIAQYHVMNDH 356
      ***** **.*.*****:*****:*****:*****:*****:*** :*:

human  HRSEEELLVIFNKKISKNPTFKLLKDKVKLVK 379
mouse  HTSEEELLAIFNRKISRNPFTKVLKDRVKLLK 388
      * ***** *****.*****.*****

```

Fig. S4

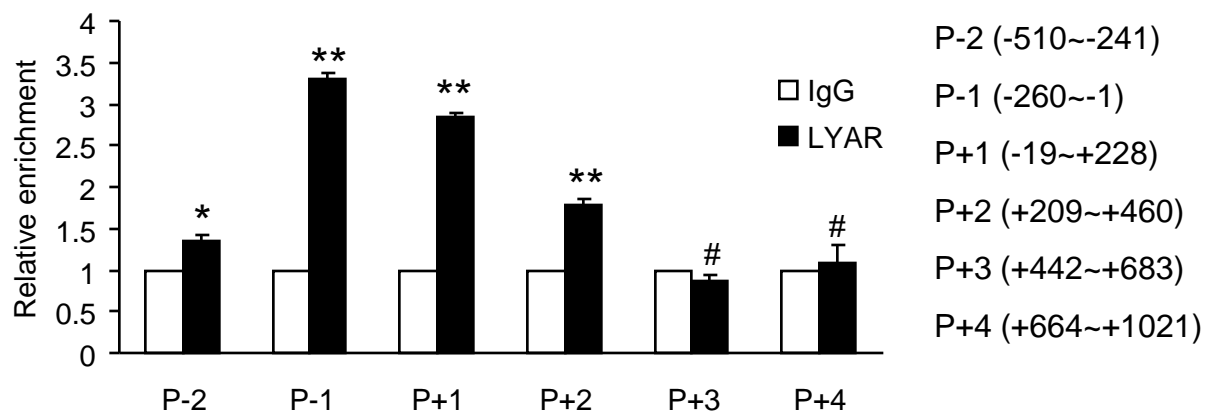

AGGGTTATATGGGAAAATTAAGG  
 GTAATTGGTTATGATGTAGAGTGTT  
 GTAGGGTTATTGGTACCGATTAGTAG  
 AACAAAGAAATCAGGCCTCCGGTTAGCG  
 GAAACCTACGCCGCACTCCAGGTTAG  
 CGGGTTAGATGGTGTGGGCATAGGCT  
 GAAACCTACGCCGCACTCCAGGTTAG  
 GAGTGTTTGGCCGGTAGGGTTAGCTA  
 CGTGTATACCGTTATGTGGGCGTAAG  
 GCGCTTATTCGGGCTCAGGGTGGAAC  
 GTGTTATCATACTGTCAATTTCTCC  
 GAAAGGTCGAGTGGTCATCGGGGTCA  
 CCTACCCTTCCATGGTGCTGATTATA  
 TATAGCGTGGTGATTAATTTCCATTT  
 ATGAAGAGTTATAGGGACTGTGAAAT  
 TGGACAAACAAATGGTGATGCATTCG  
 ATCCGGCATTAAAGAGATGTTATGACC  
 AATATCCTCAATAGGCTTATAGATTG  
 AAACGGATAACACATTGAACTTATC  
 CCACAGCGGGTTTAAATTCAAAGTAC  
 ATGTTACATTAGGAACCTGTAGGTTTG  
 GTGGGAGAGGTTTATTTGATGCTTG  
 ACCGGCAGGTGAGGATTTTTCGCCTTT  
 TCTCGTTTTCTGCCTCTGCGGAATG  
 TTACGCTTAGACAGTCTCTTCCGGT  
 ACTAAGTAGGTGTTGTCCGTTGTAT  
 CAGTTGTAGATTGTTACAGGGGTGGTA  
 CATACCCTCGCCAGATCATCTTATGG  
 GCTCATTGGTCCACGGGCGTTTTCT  
 GTAGGGTTATTGGTACCGATTAGTAG  
 GTAATTGGTTATGATTGTAGAGTGTT  
 TTGTAACCTCTATGGTGAAAGTTTCA  
 AAGTTTGTGATATTTCTGTTCACCTA  
 GGGCTCTAAACTTTATACTATTTGTG  
 TCTTAATCAGGCAGGAATTATCGGCC  
 CCCCAGTGTGGAGGGCTGTGTAC  
 TTGAGTGATATTTGTGTCAGTAT  
 CTCGTTAGCGGATGAAACAAAGGGAG  
 CTCTGTTTGTGGCTGTGAACTATC  
 TAGTGTGATATGAAGAGAATAAAAAGC  
 CGAAACGGGTCTCGCGAGACAGATAT  
 GGGCGCCCGTGATCTTACCATATAA  
 AGGGCCTGGCTTGTCTTTTGGTGTGT  
 CGTCCGTTCTTTGATATGAGTCCAGG  
 GCTCTGCCGTAATGAACGATCCCCG  
 GTGACCGGGTTGGTGAAGAAGCTCC  
 GCAGGGCTACACTTTTCACTTACACG  
 TATGGTTCCGGTAAGAACTGGACA  
 GGTTTCFACTGCAATGGATAAGCCAT  
 GCACTGCTGTACGGGTGTCAGACAC  
 AGCTCCAGCGTAATTATAATCCCC  
 GACCGTCAGTTTAGTTGCTACAGAT  
 AGTAAATGTGACTTAACGCGATTACA  
 AACTGGTCTTCTTATTTATACACT  
 AGTCTGTGAGCGATTGTACCAGGGTT  
 GCAGGGCTACACTTTTCACTTACACG  
 TGACAAGAGCCGATGCCAACATTATA  
 TACTGATGTGTATGGGGTCAATGTGT  
 ACGACTAACAAGAGGACATGAAAGGC  
 CTGGTATGTAATTATCAACACATGC  
 ATGTCTAGCGAGAATGGGATAGTTGT  
 TGAGCGTTGTTGCCAACGAAGACTTGG  
 ATGCATGCCAGCACGTCCCATATTAT  
 CTCGGCTCTTACCGATTAGCTCTTT  
 ACCTGATGGTAGTCTTAATTATGTTT  
 ACGGGCTAAGTTGCGGTATGAGGGTT  
 TCACGCATCATACTAGGTTAGTGC  
 AGATTCTGTGAATGTGCACGGAATGA  
 AACCCACCGGTAACTTCATGAGGCA

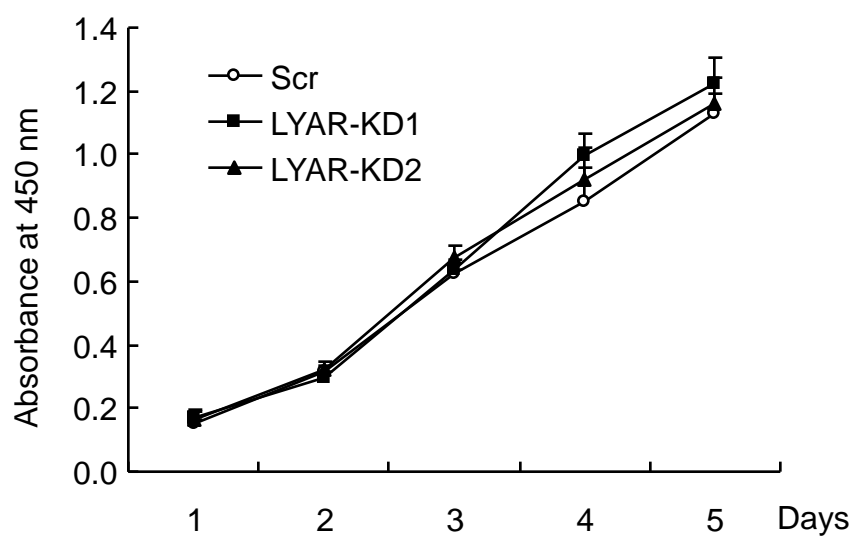



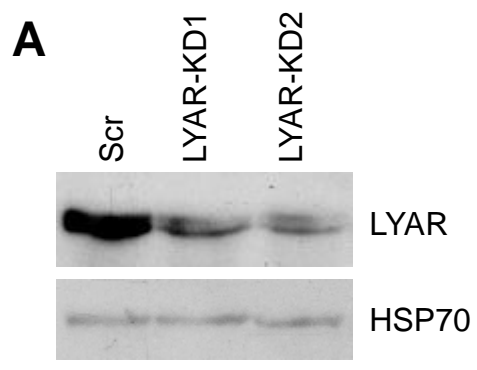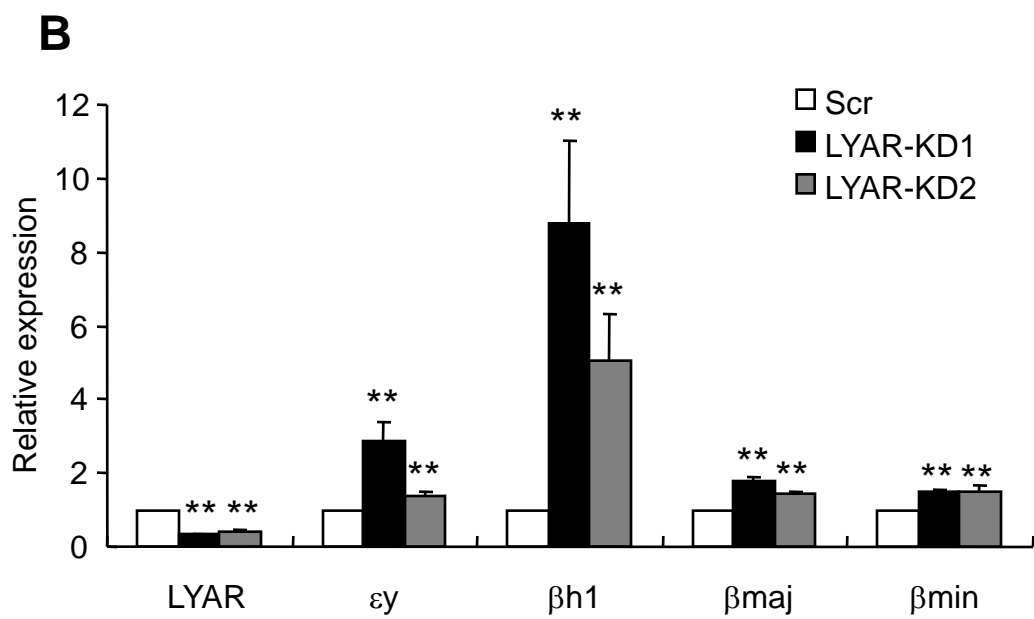

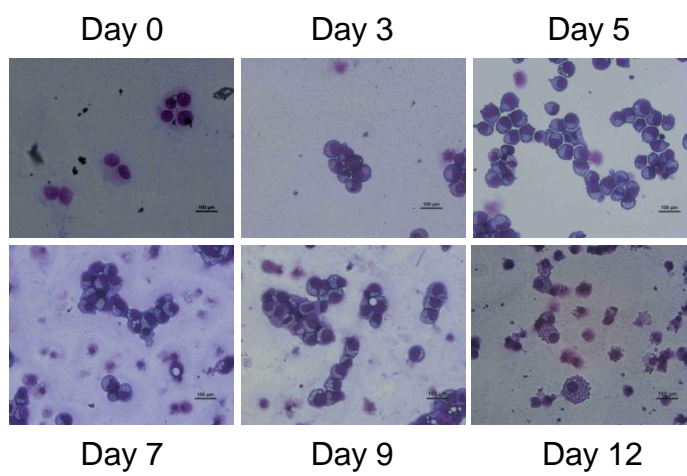

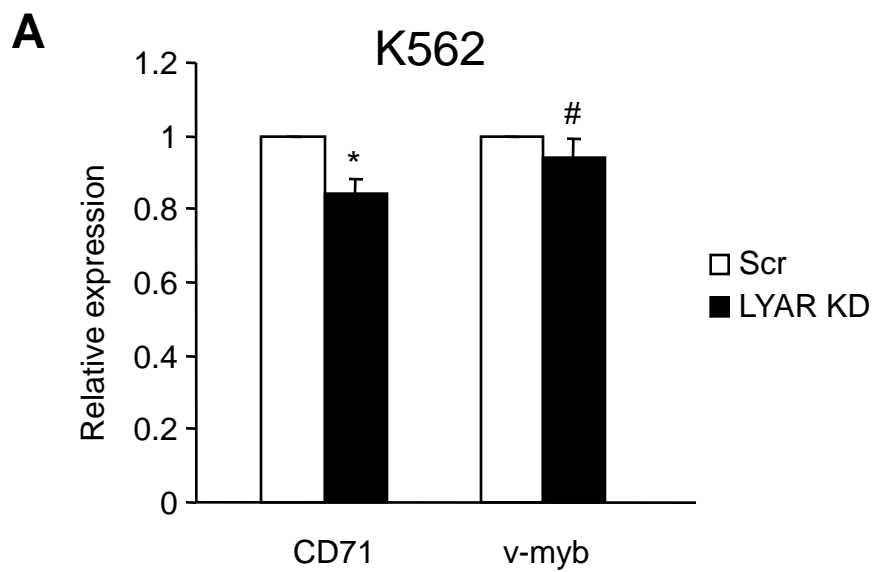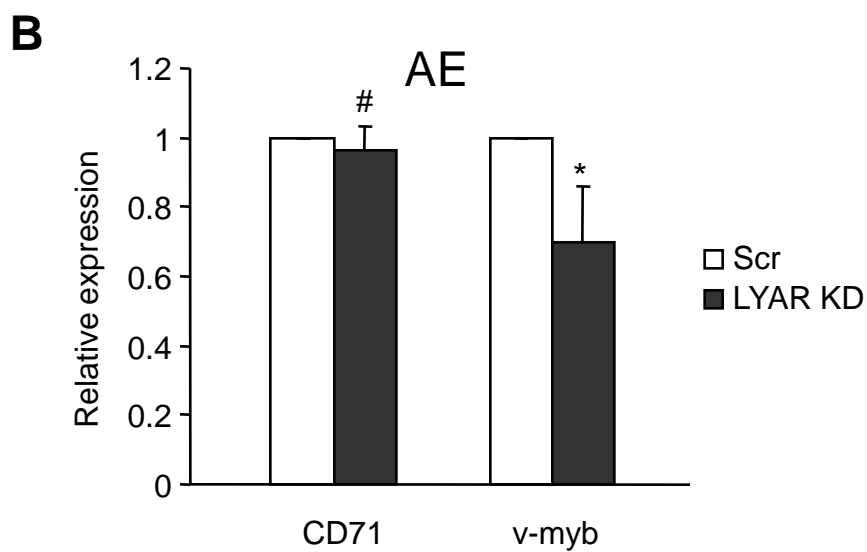

Supplement: supp_gku718_nar-01796-x-2014-File002.pdf [file supp_gku718_nar-01796-x-2014-File002.pdf]
